# Supplementary material for: Self-Reported Anxiety and Depression among Parents of Primary School Children during the COVID-19 Pandemic in Thailand, 2022
Source: MDPI journal article supplement (doi:10.3390/ijerph20095622), 2023-04-24
Supplement: s1 [file s1]

**Supplementary file S1: Participants by school type, location, and questionnaire types**

**Table S1a: Percentages of participants by school type and location**

| Province     | School     |            | N          | %            |
|--------------|------------|------------|------------|--------------|
|              | Public     | Private    |            |              |
| Bangkok      | 12         | 43         | 55         | 7.8          |
| Chiang Rai   | 50         | 45         | 95         | 13.5         |
| Udon Thani   | 229        | 138        | 367        | 52.4         |
| Chonburi     | 48         | 43         | 91         | 13.0         |
| Songkhla     | 50         | 43         | 93         | 13.3         |
| <b>Total</b> | <b>389</b> | <b>312</b> | <b>701</b> | <b>100.0</b> |

**Table S1b: Percentages of participants in the survey by school location and type of questionnaires**

| Province     | Type of questionnaires |             |            |             | Total      |
|--------------|------------------------|-------------|------------|-------------|------------|
|              | paper-based (n)        | %           | online (n) | %           |            |
| Bangkok      | 43                     | 78.2        | 12         | 21.8        | 55         |
| Chiang Rai   | 95                     | 100.0       | 0          | 0.0         | 95         |
| Udon Thani   | 0                      | 0.0         | 367        | 100.0       | 367        |
| Chonburi     | 0                      | 0.0         | 91         | 100.0       | 91         |
| Songkhla     | 93                     | 100.0       | 0          | 0.0         | 93         |
| <b>Total</b> | <b>231</b>             | <b>32.9</b> | <b>470</b> | <b>67.1</b> | <b>701</b> |
